# Supplementary material for: An Engineered Version of Human PON2 Opens the Way to Understand the Role of Its Post-Translational Modifications in Modulating Catalytic Activity
Source: PLOS journal article supplement (doi:10.1371/journal.pone.0144579), 2015-12-10

**S4 Figure. Enzyme stability.**

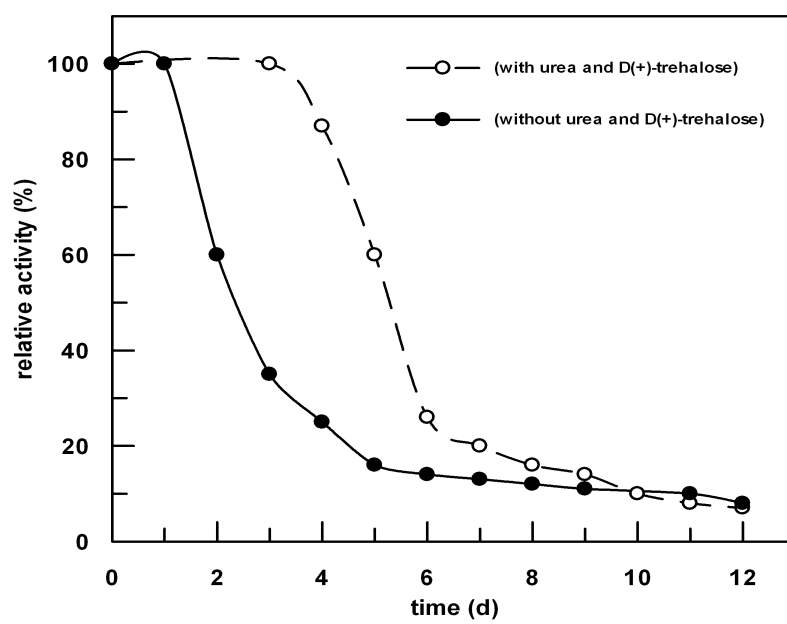

Supplement: S4 (10.1371/journal.pone.0144579.s004) [file journal.pone.0144579.s004]
